# Supplementary material for: Preparation and properties of dual-mode luminescent NaYF4:Yb,Tm@SiO2/carbon dot nanocomposites
Source: Royal Society of Chemistry journal article supplement (doi:10.1039/c8tc03508c), 2018-01-01
Supplement: c8tc03508c1.pdf [file c8tc03508c1.pdf]

## Supporting Information

### **Preparation and Properties of Dual-mode Luminescent**

### **NaYF<sub>4</sub>:Yb,Tm@SiO<sub>2</sub>/carbon dots Nanocomposites**

Xiaokai Xu,<sup>a</sup> Wei Li,<sup>a</sup> Wan Zhou,<sup>a</sup> Guiping Tan,<sup>b</sup> Yihao Zheng,<sup>a</sup> Chaofan Hu,<sup>a</sup> Bingfu Lei,<sup>a</sup> Xuejie Zhang,<sup>a</sup> Yingliang Liu<sup>\*a</sup> and Jianle Zhuang<sup>\*a</sup>

<sup>a</sup> *Guangdong Provincial Engineering Technology Research Center for Optical Agriculture, College of Materials and Energy, South China Agricultural University, Guangzhou 510642, China.*

<sup>b</sup> *School of Environment and Civil Engineering, Guangdong Engineering and Technology Research Center for Advanced Nanomaterials, Dongguan University of Technology, Dongguan 523808, China.*

*\*E-mail: zhuangjl@scau.edu.cn, tliuyl@scau.edu.cn*

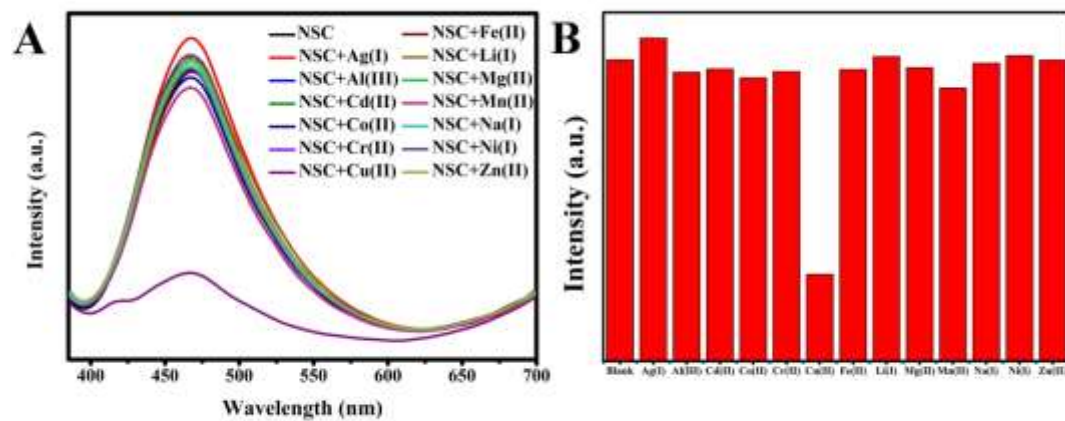

**Figure S1.** (A) Fluorescence emission spectra of NSC (NaYF<sub>4</sub>:Yb,Tm@SiO<sub>2</sub>/CDs solution) after addition of various metal ions under 365 nm excitation. (B) A histogram of the effect of metal ions on the fluorescence quenching of NSC under 365 nm excitation.

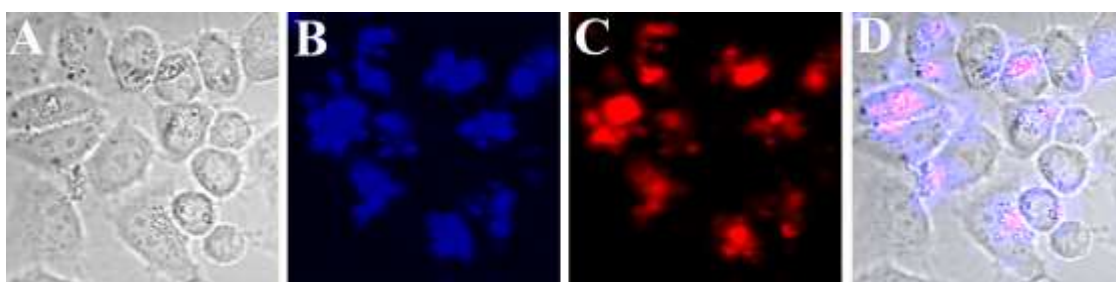

**Figure S2.** *In vitro* UC optical bioimaging of HeLa cells treated with NaYF<sub>4</sub>:Yb,Tm@SiO<sub>2</sub>/CDs nanocomposites under 980 nm excitation. (A) bright field image, (B) corresponding blue UC emission image (460-500 nm), (C) red-green UC emission image (570-694 nm) and (D) the overlay of the fluorescence microscopy image and bright field image.
